# Supplementary material for: An efficient approach for low latency processing in stream data
Source: PeerJ journal article supplement (doi:10.7717/peerj-cs.426), 2021-03-10
Supplement: Code.zip [file Code.zip]

Combining  
Apache Beam  
and  
Apache Tika  
can help to ingest  
the content from the files  
in most known formats.
